# Supplementary material for: Surfactant-free synthesis of polyethylene nanoparticles: toward more realistic model nanoplastics
Source: Royal Society of Chemistry journal article supplement (doi:10.1039/d5py01074h), 2025-12-09
Supplement: d5py01074h1.pdf [file d5py01074h1.pdf]

## **Supporting information**

### **Surfactant-free synthesis of polyethylene nanoparticles: toward more realistic model nanoplastics**

Lea Jacquin<sup>a</sup>, Edgar Espinosa<sup>a</sup>, Pierre-Yves Dugas<sup>a</sup>, Muriel Lansalot<sup>a</sup>, Elodie Bourgeat Lami<sup>a</sup>, Vincent Monteil<sup>a</sup>, Fabrice Brunel<sup>a</sup>

# Table of contents

|    |                                                                                                                                                                                                            |    |
|----|------------------------------------------------------------------------------------------------------------------------------------------------------------------------------------------------------------|----|
| 1. | Kinetic study on radical emulsion polymerization of ethylene .....                                                                                                                                         | 3  |
| •  | Table S1 : Kinetics of radical emulsion polymerization of ethylene at 100 bar with an anionic or cationic initiator.....                                                                                   | 3  |
| •  | Figure S1 : Effect of reaction time on particle diameter, particle number and polymer content during radical emulsion polymerization of ethylene using APS and AIBA as initiators, without surfactant..... | 3  |
| •  | Figure S2: (Cryo)-TEM images of anionic PE nanoparticles obtained by radical emulsion polymerization with different ethylene pressures .....                                                               | 4  |
| •  | Table S2 : SAXS goodness-of-fit parameters for free-radical ethylene emulsion polymerization.....                                                                                                          | 5  |
| •  | Table S3 : Successive seeding of surfactant-free PE latex at $P_{\text{ethylene}} = 100$ bar .....                                                                                                         | 5  |
| •  | Figure S3: SAXS curves of anionic PE NPs obtained by successive latex seedings.....                                                                                                                        | 6  |
| •  | Table S4 : SAXS goodness-of-fit parameters for successive seeding of surfactant-free PE latex .....                                                                                                        | 6  |
| 2. | Radical emulsion copolymerization of ethylene with vinyl acetate .....                                                                                                                                     | 7  |
| •  | Figure S4 : TEM images of EVA copolymer nanoparticles obtained by radical emulsion copolymerization of ethylene and VAc with different VAc molar fractions .....                                           | 7  |
| •  | Figure S5 : SAXS curves of EVA copolymer nanoparticles obtained by radical emulsion polymerization with different VAc molar fractions .....                                                                | 8  |
| •  | Table S5 : Characterization parameters of EVA nanoparticles based on SAXS curve fits.....                                                                                                                  | 9  |
| •  | Table S6 : Influence of ethylene pressure on the synthesis of anionic EVA nanoparticles by surfactant-free radical emulsion polymerization of ethylene .....                                               | 9  |
| •  | Figure S6: TEM images of EVA copolymer nanoparticles obtained by radical emulsion polymerization at different ethylene pressures .....                                                                     | 10 |
| 3. | Radical emulsion copolymerization of ethylene with carbon monoxide .....                                                                                                                                   | 11 |
| •  | Figure S7 : SAXS curves of ECO copolymer nanoparticles obtained by radical emulsion polymerization with a) different ethylene pressures and b) different carbon monoxide pressures .....                   | 11 |
| •  | Table S7 : SAXS goodness-of-fit parameters for ethylene-carbon monoxide copolymers.....                                                                                                                    | 11 |
| •  | Figure S8: FTIR spectra of ECO copolymers obtained by surfactant-free radical emulsion copolymerization of ethylene and CO at different CO pressures.....                                                  | 12 |

# 1. Kinetic study on radical emulsion polymerization of ethylene

Table S1 : Kinetics of radical emulsion polymerization of ethylene at 100 bar with an anionic or cationic initiator

| Time (hours) | PC <sup>[a]</sup> (%) | $\zeta$ <sup>[b]</sup> (mV) | $Z_{ave}$ <sup>[c]</sup> (nm) | Pdl <sup>[d]</sup> | $N_p$ <sup>[e]</sup> (mL <sup>-1</sup> ) | $D_n$ <sup>[f]</sup> (nm) | $D_w/D_n$ <sup>[f]</sup> | $D_{SAXS}$ <sup>[g]</sup> (nm) | $\sigma$ <sup>[g]</sup> | $T_m$ <sup>[h]</sup> (°C) | $T_c$ <sup>[i]</sup> (°C) | $X_c$ <sup>[j]</sup> (%) | $M_n$ <sup>[k]</sup> (g mol <sup>-1</sup> ) | $M_w$ <sup>[k]</sup> (g mol <sup>-1</sup> ) | $\mathcal{D}$ <sup>[k]</sup> |
|--------------|-----------------------|-----------------------------|-------------------------------|--------------------|------------------------------------------|---------------------------|--------------------------|--------------------------------|-------------------------|---------------------------|---------------------------|--------------------------|---------------------------------------------|---------------------------------------------|------------------------------|
| 1*           | 0.3                   | -42                         | 50                            | 0.02               | $4.3 \times 10^{13}$                     | 47                        | 1.03                     | 47                             | 0.01                    | 93                        | 73                        | 25                       | 3 200                                       | 29 800                                      | 9.4                          |
| 2*           | 0.6                   | -39                         | 68                            | 0.01               | $4.4 \times 10^{13}$                     | 65                        | 1.02                     | nd                             | nd                      | 93                        | 76                        | 26                       | 2 200                                       | 10 500                                      | 4.7                          |
| 3*           | 1.2                   | -47                         | 71                            | 0.01               | $7.3 \times 10^{13}$                     | 64                        | 1.04                     | nd                             | nd                      | 92                        | 75                        | 27                       | 2 400                                       | 11 800                                      | 5.0                          |
| 4*           | 2.0                   | -42                         | 82                            | 0.01               | $6.3 \times 10^{13}$                     | 78                        | 1.02                     | 77                             | 0.03                    | 91                        | 72                        | 24                       | 2 800                                       | 24 600                                      | 8.9                          |
| 5*           | 1.9                   | -42                         | 96                            | 0.01               | $4.5 \times 10^{13}$                     | 83                        | 1.01                     | 85                             | 0.03                    | 94                        | 78                        | 30                       | 3 500                                       | 17 000                                      | 4.8                          |
| 6*           | 1.3                   | -45                         | 98                            | 0.02               | $3.1 \times 10^{13}$                     | 91                        | 1.01                     | 86                             | 0.02                    | 93                        | 74                        | 25                       | 3 600                                       | 15 200                                      | 4.2                          |
| 1**          | 0.7                   | 36                          | 46                            | 0.03               | $1.6 \times 10^{14}$                     | 41                        | 1.09                     | 44                             | 0.08                    | 90                        | 74                        | 20                       | 2 900                                       | 8 200                                       | 2.8                          |
| 2**          | 1.1                   | 44                          | 59                            | 0.03               | $1.1 \times 10^{14}$                     | 55                        | 1.07                     | 55                             | 0.08                    | 93                        | 71                        | 22                       | 3 400                                       | 9 700                                       | 2.8                          |
| 3**          | 1.3                   | 43                          | 54                            | 0.04               | $1.7 \times 10^{14}$                     | 46                        | 1.07                     | 52                             | 0.06                    | 90                        | 67                        | 23                       | 3 400                                       | 9 900                                       | 2.9                          |
| 4**          | 1.4                   | 44                          | 50                            | 0.05               | $2.5 \times 10^{14}$                     | 48                        | 1.03                     | 53                             | 0.06                    | 91                        | 72                        | 24                       | 4 900                                       | 13 600                                      | 2.8                          |
| 5**          | 1.5                   | 38                          | 58                            | 0.05               | $1.7 \times 10^{14}$                     | 49                        | 1.02                     | nd                             | nd                      | 92                        | 71                        | 25                       | 3 200                                       | 12 100                                      | 3.8                          |
| 6**          | 2.1                   | 48                          | 61                            | 0.04               | $2.1 \times 10^{14}$                     | 51                        | 1.04                     | 58                             | 0.06                    | 93                        | 73                        | 30                       | 4 300                                       | 12 900                                      | 2.9                          |

Synthesis conditions: \*[APS] = 1 g L<sup>-1</sup>, [NaHCO<sub>3</sub>] = 1 g L<sup>-1</sup>, 75 °C, 250 RPM, 4 h, pH = 7.5 and \*\*[AIBA] = 1 g L<sup>-1</sup>, 75 °C, 250 RPM, 4 h, pH = 8. <sup>[a]</sup> Polymer content, determined by gravimetry using equation (4), <sup>[b]</sup> Zeta potential of particles in deionized water, determined using equation (2), <sup>[c]</sup> Hydrodynamic diameter and polydispersity index determined by DLS, <sup>[d]</sup> Particle number, determined using equation (1), <sup>[e]</sup> Number-average diameter and associated dispersity, determined by TEM using equation (5), <sup>[f]</sup> Average diameter and log-normal standard deviation, determined by SAXS using equation (7), <sup>[g]</sup> Melting temperature, determined by DSC, <sup>[h]</sup> Crystallization temperature, determined by DSC, <sup>[i]</sup> Crystallinity, determined by DSC using equation (12), <sup>[j]</sup> Molar masses in number, in weight and dispersity, determined by HT-SEC.

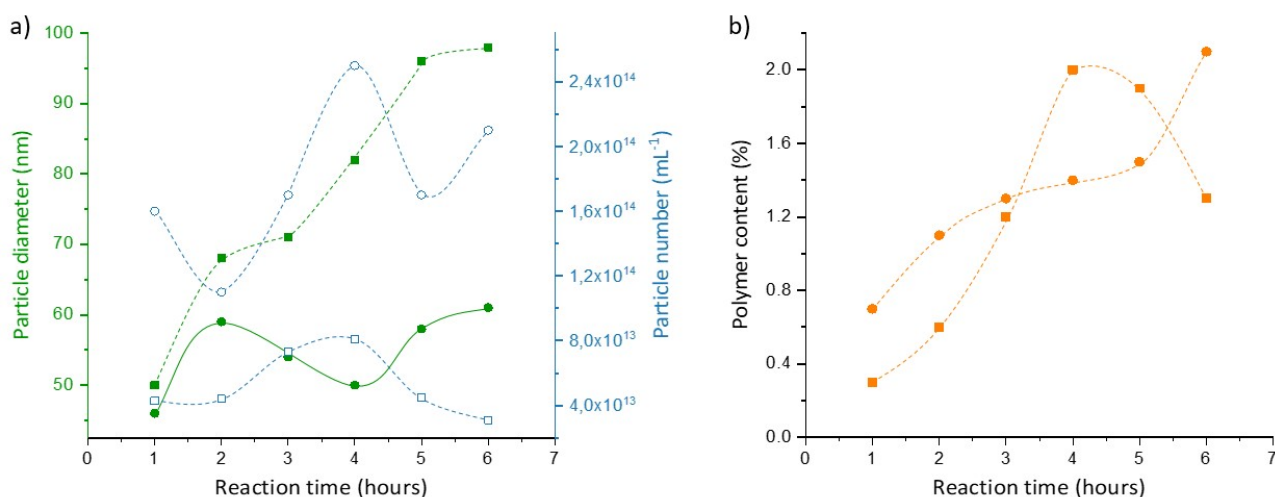

Figure S1 : Effect of reaction time on a) particle diameter (■ NPs APS and ● NPs AIBA), and particle number (□ NPs APS and ○ NPs AIBA), and b) on polymer content (■ NPs APS and ● NPs AIBA) during radical emulsion polymerization of ethylene using APS and AIBA as initiators, without surfactant. Synthesis conditions: (●, ○) [AIBA] = 1 g L<sup>-1</sup>, 75 °C,  $P_{ethylene}$  = 100 bar, 250 RPM, pH = 8; and (■, □) [APS] = 1 g L<sup>-1</sup>, [NaHCO<sub>3</sub>] = 1 g L<sup>-1</sup>, 75 °C,  $P_{ethylene}$  = 100 bar, 250 rpm-1, pH = 7.8

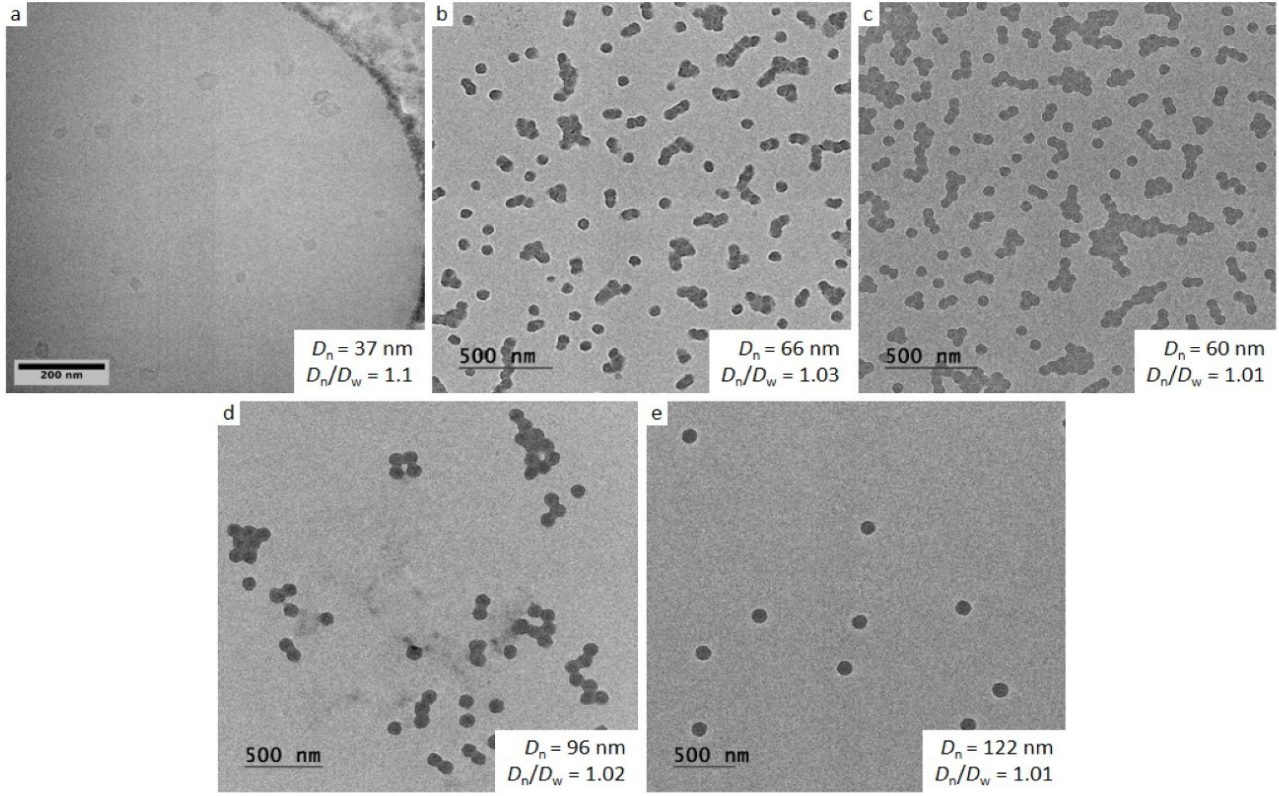

Figure S2: (Cryo)-TEM images of anionic PE nanoparticles obtained by radical emulsion polymerization with different ethylene pressures. a) 50 bar, b) 75 bar, c) 100 bar, d) 150 bar, e) 200 bar. Synthesis conditions: [APS] = 1 g L<sup>-1</sup>, [NaHCO<sub>3</sub>] = 1 g L<sup>-1</sup>, 75 °C, 250 RPM, 4 h, pH = 7.5

Goodness-of-fit parameters for SAXS analyses were calculated as follows:

The  $R_f$  factor was measure of model quality which is defined as

$$R_f = \frac{\sum_{i=1}^N ||I_{exp}(q)| - |I_{th}(q)||}{\sum_{i=1}^N |I_{exp}(q)|} \quad (S1)$$

Theoretical values of  $R_f$  range from 0 (perfect agreement of calculated and observed intensities) to infinity.  $R_f$  factors greater than 0.5 indicate very poor agreement between observed and calculated intensities. Models refining to  $R_f < 0.05$  are often considered to be good. Weighted  $R_f$  factors  $R_w$  are also often used to track least-squares refinement, since the functions minimized are weighted according to estimates of the precision of the measured quantity. The weighted residuals are defined as:

$$R_w = \sqrt{\frac{\sum_{i=1}^N \left( \frac{||I_{exp}(q)| - |I_{th}(q)||}{\Delta I(q)} \right)^2}{\sum_{i=1}^N \frac{I(q)_{exp}^2}{\Delta I(q)^2}}} \quad (S2)$$

The interpretation of the parameters  $R_n$  and  $R_w$  can be summarized as:

- $R_f, R_w > 0.3$ : questionable
- $0.1 > R_f, R_w > 0.3$ : may be acceptable
- $R_f, R_w < 0.1$ : believable

Table S2 : SAXS goodness-of-fit parameters for free-radical ethylene emulsion polymerization

| $P_{\text{ethylene}}$<br>(bar) | $R_f$    | $R_w$    |
|--------------------------------|----------|----------|
| 50*                            | 0.043556 | 0.091436 |
| 75*                            | 0.091436 | 0.119614 |
| 100*                           | 0.021452 | 0.013532 |
| 150*                           | 0.013556 | 0.051321 |
| 200*                           | 0.010065 | 0.057555 |
| 50**                           | 0.039646 | 0.023999 |
| 75**                           | 0.032639 | 0.033186 |
| 100**                          | 0.039646 | 0.023999 |
| 150**                          | 0.060087 | 0.049668 |
| 175**                          | 0.008526 | 0.014610 |
| 200**                          | 0.071856 | 0.063044 |

Synthesis conditions: \*[APS] = 1 g L<sup>-1</sup>, [NaHCO<sub>3</sub>] = 1 g L<sup>-1</sup>, 75 °C, 250 RPM, 4 h, pH = 7.5 and \*\*[AIBA] = 1 g L<sup>-1</sup>, 75 °C, 250 RPM, 4 h, pH = 8.

Table S3 : Successive seeding of surfactant-free PE latex at  $P_{\text{ethylene}} = 100$  bar

| Latex | $N_p^{[a]}$<br>( $\text{mL}^{-1}$ ) | $N_p^{[b]}$<br>( $\text{mL}^{-1}$ ) | PC <sup>[c]</sup><br>(%) | $\zeta^{[d]}$<br>(mV) | $Z_{\text{ave}}^{[e]}$<br>(nm) | PDI <sup>[e]</sup> | $D_n^{[f]}$<br>(nm) | $D_w/D_n^{[f]}$ | $D_{\text{SAXS}}^{[g]}$<br>(nm) | $\sigma^{[g]}$ | $T_m^{[h]}$<br>(°C) | $T_c^{[i]}$<br>(°C) | $X_c^{[j]}$<br>(%) | $M_n^{[k]}$<br>( $\text{g mol}^{-1}$ ) | $M_w^{[k]}$<br>( $\text{g mol}^{-1}$ ) | $\bar{D}^{[k]}$ |
|-------|-------------------------------------|-------------------------------------|--------------------------|-----------------------|--------------------------------|--------------------|---------------------|-----------------|---------------------------------|----------------|---------------------|---------------------|--------------------|----------------------------------------|----------------------------------------|-----------------|
| 0     | 0                                   | $3.2 \times 10^{13}$                | 5.2                      | -51                   | 153                            | 0.02               | 133                 | 1.02            | nd                              | nd             | 102                 | 84                  | 39                 | 3 200                                  | 24 000                                 | 7.6             |
| 1     | $1.2 \times 10^{13}$                | $1.2 \times 10^{13}$                | 4.1                      | -47                   | 197                            | 0.03               | 151                 | 1.11            | nd                              | nd             | 99                  | 81                  | 36                 | 1 200                                  | 17 400                                 | 14.9            |
| 2     | $5.8 \times 10^{12}$                | $1.1 \times 10^{13}$                | 3.9                      | -46                   | 214                            | 0.06               | 160                 | 1.36            | nd                              | nd             | 99                  | 79                  | 35                 | 1 500                                  | 14 900                                 | 9.8             |
| 3     | $4.5 \times 10^{12}$                | $1.1 \times 10^{13}$                | 3.9                      | -47                   | 197                            | 0.12               | 129                 | 1.52            | nd                              | nd             | 98                  | 79                  | 37                 | 1 300                                  | 13 200                                 | 10.2            |
| 4     | $5.8 \times 10^{12}$                | $1.4 \times 10^{13}$                | 3.8                      | -44                   | 181                            | 0.13               | 124                 | 1.66            | nd                              | nd             | 98                  | 76                  | 33                 | 1 000                                  | 12 500                                 | 12.2            |
| 0'    | 0                                   | $2.4 \times 10^{13}$                | 4.6                      | -52                   | 160                            | 0.01               | 146                 | 1.01            | 72                              | 0.04           | 97                  | 78                  | 29                 | 7 300                                  | 23 900                                 | 3.2             |
| 1'    | $2.1 \times 10^{13}$                | $1.9 \times 10^{13}$                | 5.3                      | -53                   | 180                            | 0.02               | 152                 | 1.01            | 80                              | 0.06           | 97                  | 79                  | 30                 | 3 700                                  | 14 000                                 | 3.8             |
| 2'    | $1.5 \times 10^{13}$                | $1.6 \times 10^{13}$                | 5.6                      | -54                   | 199                            | 0.03               | 168                 | 1.01            | 92                              | 0.06           | 97                  | 78                  | 29                 | 4 700                                  | 16 200                                 | 3.4             |
| 3'    | $1.1 \times 10^{13}$                | $1.1 \times 10^{13}$                | 4.5                      | -54                   | 208                            | 0.02               | 187                 | 1.02            | 96                              | 0.07           | 99                  | 75                  | 29                 | 4 400                                  | 28 100                                 | 6.4             |

Synthesis conditions: Latex 0: [APS] =  $1 \text{ g L}^{-1}$ , [NaHCO<sub>3</sub>] =  $1 \text{ g L}^{-1}$ ,  $P_{\text{ethylene}}$  = 150 bar, 75 °C, 250 RPM, 6 h, pH = 7.8, Latex 1-4: [APS] =  $1 \text{ g L}^{-1}$ , [NaHCO<sub>3</sub>] =  $1 \text{ g L}^{-1}$ ,  $P_{\text{ethylene}}$  = 200 bar, 75 °C, 250 RPM, 6 h, pH = 7.8 and Latex 1'-3': [APS] =  $0.5 \text{ g L}^{-1}$ , [NaHCO<sub>3</sub>] =  $0.5 \text{ g L}^{-1}$ ,  $P_{\text{ethylene}}$  = 100 bar, 75 °C, 250 RPM, 4 h, pH = 7.8, PC<sub>initial</sub> = 4 %. <sup>[a]</sup> Initial particle number, determined using equation (1), <sup>[b]</sup> Final particle number, determined using equation (1), <sup>[c]</sup> Final polymer content, determined by gravimetry using equation (4), <sup>[d]</sup> Zeta potential of particles in deionized water using equation (2), <sup>[e]</sup> Hydrodynamic diameter and polydispersity index, determined by DLS, <sup>[f]</sup> Number average diameter and associated dispersity, determined by TEM using equation (5), <sup>[g]</sup> Average diameter and log-normal standard deviation, determined by SAXS using equation (7), <sup>[h]</sup> Melting temperature, determined by DSC, <sup>[i]</sup> Crystallization temperature, determined by DSC, <sup>[j]</sup> Crystallization rate, determined by DSC using equation (12), <sup>[k]</sup> Molar masses in number, in weight and dispersity, determined by HT-SEC.

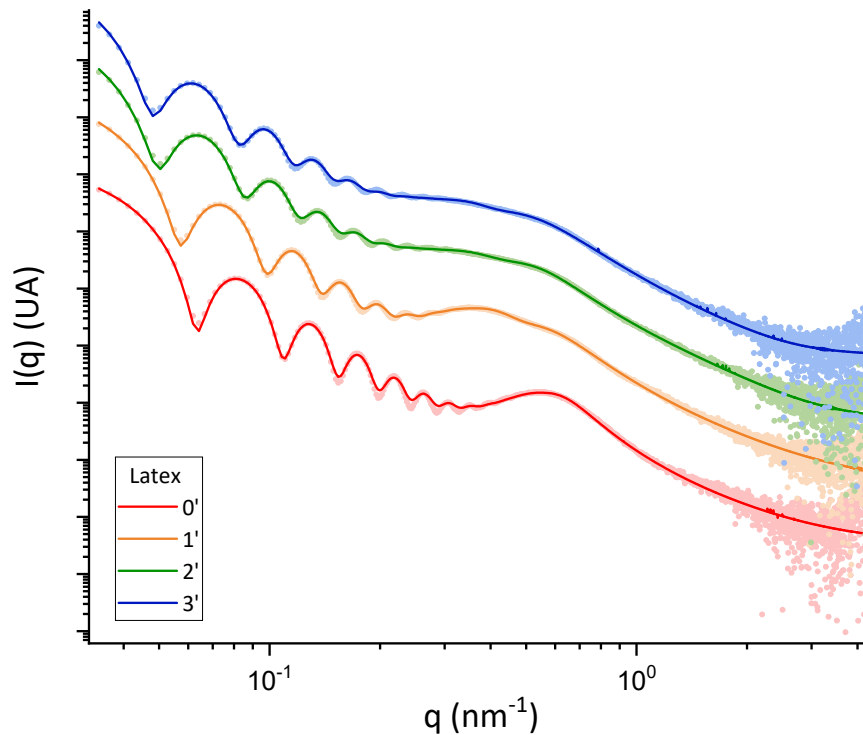

Figure S3: SAXS curves of anionic PE NPs obtained by successive latex seedings. Dashed lines represent raw datas, while solid lines correspond to fitted curves (a multiplicative factor was applied to the intensity for clarity). Synthesis conditions: Latex 0': [APS] = 1 g L<sup>-1</sup>, [NaHCO<sub>3</sub>] = 1 g L<sup>-1</sup>,  $P_{\text{ethylene}}$  = 200 bar, 75 °C, 250 RPM, 6 h, pH = 7.8 and Latex 1'-3': [APS] = 0.5 g L<sup>-1</sup>, [NaHCO<sub>3</sub>] = 0.5 g L<sup>-1</sup>,  $P_{\text{ethylene}}$  = 100 bar, 75 °C, 250 RPM, 4 h, pH = 7.8,  $PC_{\text{initial}}$  = 4 %

Table S4 : SAXS goodness-of-fit parameters for successive seeding of surfactant-free PE latex

| Latex | $R_f$    | $R_w$    |
|-------|----------|----------|
| 0'    | 0.018509 | 0.036237 |
| 1'    | 0.025081 | 0.034454 |
| 2'    | 0.058907 | 0.053440 |
| 3'    | 0.063759 | 0.053137 |

Synthesis conditions: Latex 0': [APS] = 1 g L<sup>-1</sup>, [NaHCO<sub>3</sub>] = 1 g L<sup>-1</sup>,  $P_{\text{ethylene}}$  = 200 bar, 75 °C, 250 RPM, 6 h, pH = 7.8 and Latex 1'-3': [APS] = 0.5 g L<sup>-1</sup>, [NaHCO<sub>3</sub>] = 0.5 g L<sup>-1</sup>,  $P_{\text{ethylene}}$  = 100 bar, 75 °C, 250 RPM, 4 h, pH = 7.8,  $PC_{\text{initial}}$  = 4 %

## 2. Radical emulsion copolymerization of ethylene with vinyl acetate

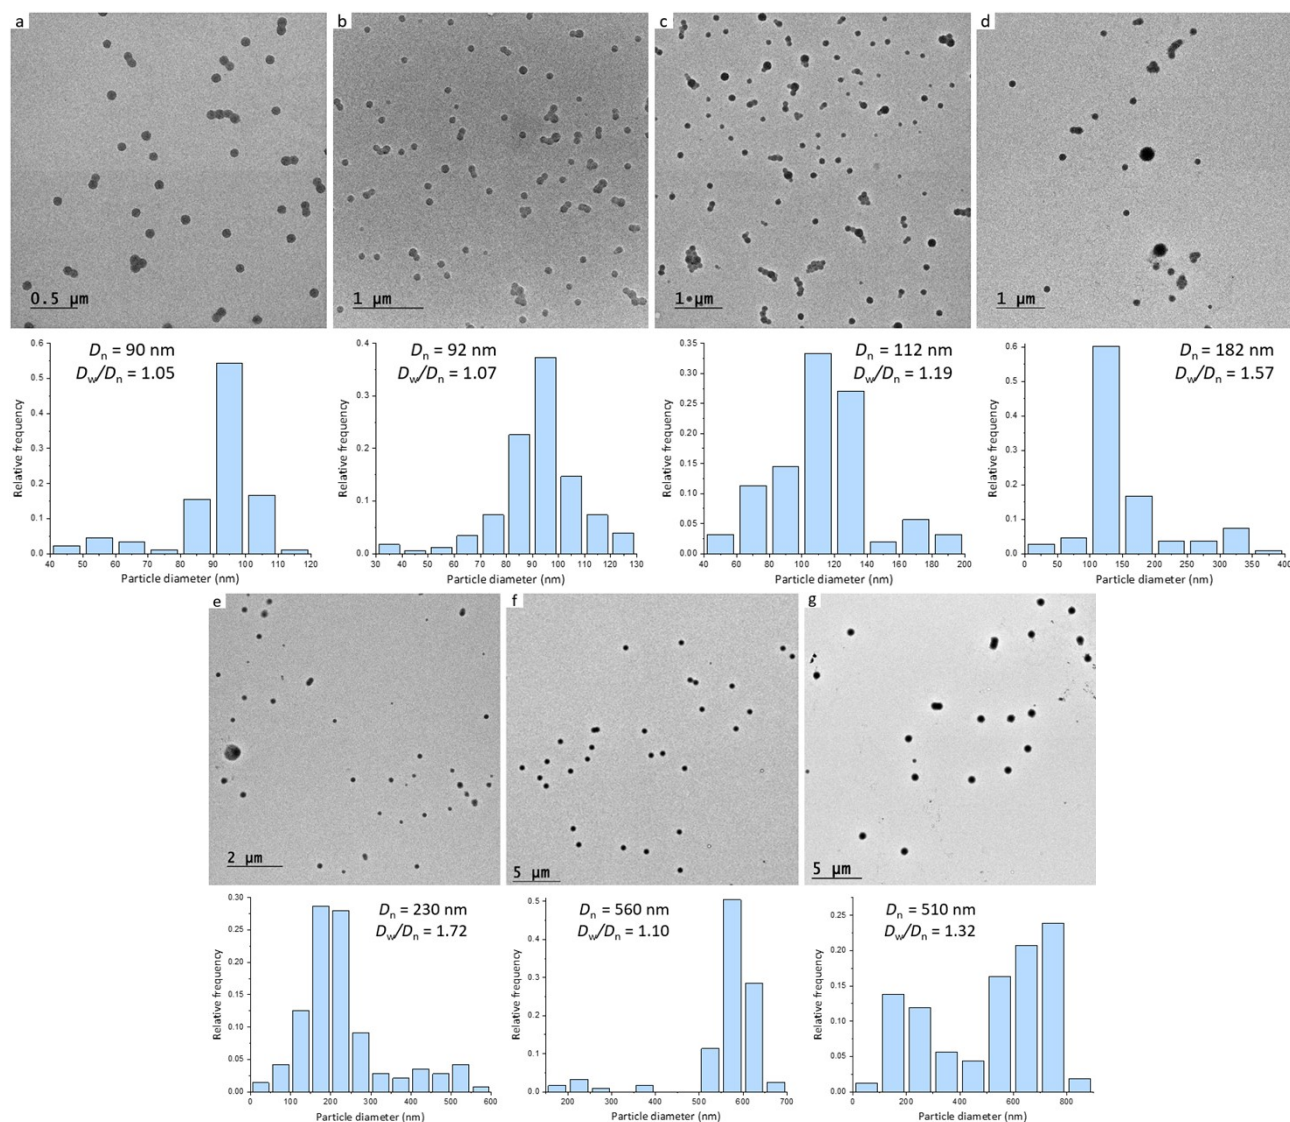



Figure S4 : TEM images of EVA copolymer nanoparticles obtained by radical emulsion copolymerization of ethylene and VAc with different VAc molar fractions. a)  $n_{VAc} = 1$  mol%, b)  $n_{VAc} = 2$  mol%, c)  $n_{VAc} = 6$  mol%, d)  $n_{VAc} = 14$  mol%, e)  $n_{VAc} = 17$  mol%, f)  $n_{VAc} = 22$  mol%, g)  $n_{VAc} = 27$  mol%. Synthesis conditions:  $[APS] = 1 \text{ g L}^{-1}$ ,  $[NaHCO_3] = 1 \text{ g L}^{-1}$ ,  $P_{ethylene} = 100 \text{ bar}$ ,  $75^\circ \text{C}$ ,  $250 \text{ RPM}$ ,  $4 \text{ h}$ ,  $\text{pH} = 7.8$

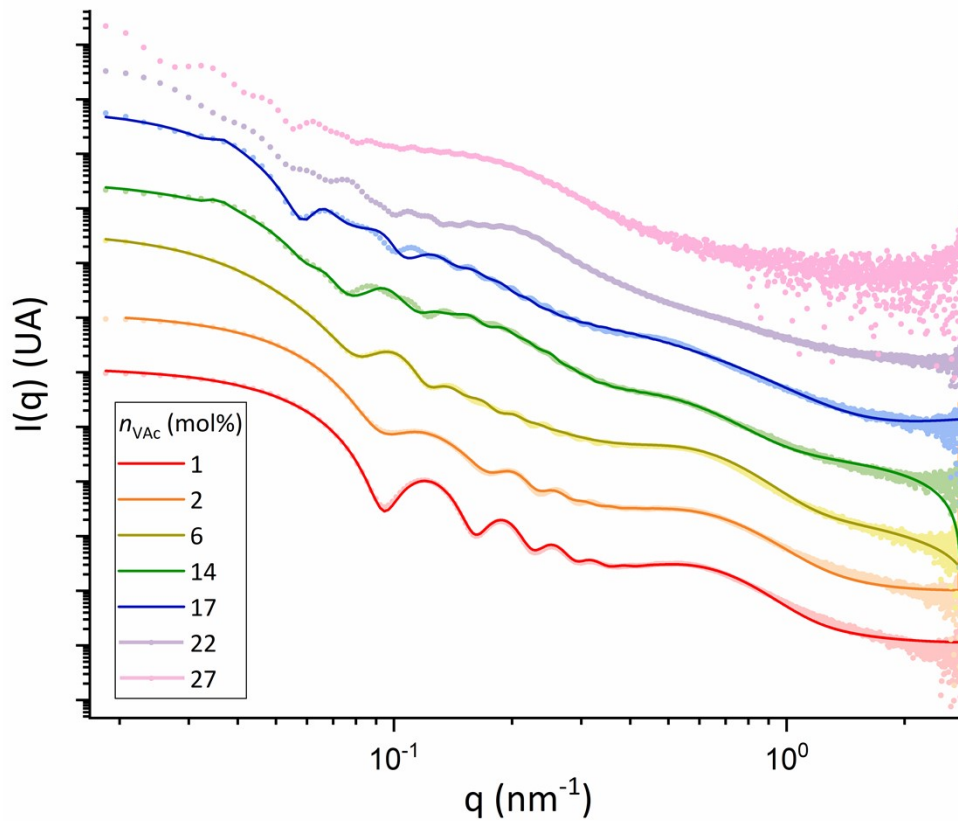

Figure S5 : SAXS curves of EVA copolymer nanoparticles obtained by radical emulsion polymerization with different VAc molar fractions. Dashed lines represent raw datas, while solid lines correspond to fitted curves (a multiplicative factor was applied to the intensity for clarity). Synthesis conditions:  $[APS] = 1 \text{ g L}^{-1}$ ,  $[NaHCO_3] = 1 \text{ g L}^{-1}$ ,  $P_{ethylene} = 100 \text{ bar}$ ,  $75^\circ \text{C}$ ,  $250 \text{ RPM}$ ,  $4 \text{ h}$ ,  $\text{pH} = 7.8$

The SAXS profiles display well-defined oscillations, characteristic of monodisperse systems. However, the positions of the scattering minima do not fit a single population, but rather suggest a mixture of monodisperse particle populations. The four curves corresponding to the lowest %VAc were therefore fitted using several monodisperse sphere form factors:

$$I(q, R, \Delta\eta) = \frac{N \pi R^3}{3} \frac{\Delta\eta^2}{(qR)^3} \quad (\text{S3})$$

with  $N$  the number of particle ( $\text{cm}^{-3}$ ),  $R$  is the sphere radius (nm) and  $\Delta\eta$  scattering length density difference between particle and the solvent ( $\Delta\eta = \eta_c - \eta_{sol}$  with:  $\eta_c = 9.25 \times 10^{10} \text{ cm}^{-2}$  and  $\eta_{sol} = 9.44 \times 10^{10} \text{ cm}^{-2}$ ). The results are presented in Table S3 below, where  $x_{nb}$  and  $x_v$  are the proportions of each population in number and volume, calculate using the formulas below:

$$x_{nb}^i = \frac{N_i}{\sum_i N_i} \times 100 \quad (\text{S4})$$

$$x_v^i = \frac{N_i R_i^3}{\sum_i N_i R_i^3} \times 100 \quad (\text{S5})$$



Table S5 : Characterization parameters of EVA nanoparticles based on SAXS curve fits

| $n_{\text{Vac}}^{[a]}$<br>(mol%) | $R^{[a]}$<br>(nm) | $N_{\text{nb}}^{[b]}$<br>(%) | $N_v^{[c]}$<br>(%) | $R_f^{[d]}$ | $R_w^{[d]}$ |
|----------------------------------|-------------------|------------------------------|--------------------|-------------|-------------|
| 1                                | 47.55             | 100                          | 100                | 0.035757    | 0.029989    |
|                                  | 55.76             | 8.59                         | 229.99             |             |             |
| 2                                | 45.27             | 33.44                        | 62.43              | 0.014423    | 0.016453    |
|                                  | 18.67             | 578.97                       | 7.59               |             |             |
| 6                                | 89.88             | 0.72                         | 15.86              | 0.022735    | 0.023441    |
|                                  | 60.95             | 8.00                         | 54.88              |             |             |
|                                  | 45.36             | 6.63                         | 18.73              |             |             |
|                                  | 16.02             | 84.65                        | 10.53              |             |             |
| 14                               | 141.68            | 0.03                         | 13.03              | 0.085609    | 0.10727     |
|                                  | 123.37            | 0.06                         | 15.65              |             |             |
|                                  | 66.56             | 0.82                         | 34.17              |             |             |
|                                  | 50.52             | 0.70                         | 12.76              |             |             |
|                                  | 12.04             | 98.40                        | 24.38              |             |             |

<sup>[a]</sup> Particle radius, <sup>[b]</sup> Number and <sup>[c]</sup> volume distributions, i.e. percentage that each size class occupies of the overall distribution, <sup>[d]</sup> Goodness-of-fit parameters

Table S6 : Influence of ethylene pressure on the synthesis of anionic EVA nanoparticles by surfactant-free radical emulsion polymerization of ethylene

| $C_{\text{VAc}}$<br>(mol L <sup>-1</sup> ) | $P_{\text{ethylene}}$<br>(bar) | PC <sup>[a]</sup><br>(%) | $Z_{\text{ave}}^{[b]}$<br>(nm) | PDI <sup>[b]</sup> | $D_n^{[c]}$<br>(nm) | $D_w/D_n^{[c]}$ | $n_{\text{Vac}}^{[d]}$<br>(mol%) | $T_m^{[e]}$<br>(°C) | $T_g^{[f]}$<br>(°C) | $X_c^{[g]}$<br>(%) | $M_n^{[h]}$<br>(g mol <sup>-1</sup> ) | $M_w^{[h]}$<br>(g mol <sup>-1</sup> ) | $\bar{D}^{[h]}$ | CI <sup>[i]</sup> |
|--------------------------------------------|--------------------------------|--------------------------|--------------------------------|--------------------|---------------------|-----------------|----------------------------------|---------------------|---------------------|--------------------|---------------------------------------|---------------------------------------|-----------------|-------------------|
| 0.47                                       | 50                             | 4.1                      | 277                            | 0.15               | 340                 | 1.42            | 32.0                             | 9                   | -10                 | 2                  | 1 700                                 | 13 900                                | 7.9             | 5.3               |
|                                            | 100                            | 3.2                      | 163                            | 0.06               | 182                 | 1.57            | 14.0                             | 65                  | -20                 | 19                 | 1 900                                 | 17 900                                | 9.5             | 3.5               |
|                                            | 150                            | 2.9                      | 172                            | 0.03               | 119                 | 1.15            | 9.0                              | 90                  | -29                 | 22                 | 2 500                                 | 23 100                                | 9.4             | 1.6               |
|                                            | 200                            | 4.5                      | 165                            | 0.06               | 126                 | 1.33            | 6.0                              | 96                  | -29                 | 32                 | 2 400                                 | 28 000                                | 11.9            | 1.4               |
| 0.12                                       | 50                             | 1.2                      | 95                             | 0.07               | nd                  | nd              | 1.8                              | 93                  | -30                 | 22                 | 1 800                                 | 16 000                                | 9               | 0.9               |
|                                            | 100                            | 1.0                      | 118                            | 0.03               | 94                  | 1.04            | 1.5                              | 90                  | -32                 | 22                 | 1 500                                 | 12 700                                | 8               | 0.8               |
|                                            | 150                            | 2.4                      | 137                            | 0.01               | 115                 | 1.02            | 0.4                              | 96                  | -35                 | 26                 | 1 800                                 | 31 600                                | 18              | 0.2               |
|                                            | 200                            | 4.1                      | 170                            | 0.01               | 138                 | 1.20            | 0.5                              | 100                 | -40                 | 33                 | 2 600                                 | 24 200                                | 9               | 0.2               |

Synthesis conditions: [APS] = 1 g L<sup>-1</sup>, [NaHCO<sub>3</sub>] = 1 g L<sup>-1</sup>, 75 °C, 250 RPM, 4 h, pH = 7.8. <sup>[a]</sup> Final polymer content, determined by gravimetry using equation (4), <sup>[b]</sup> Hydrodynamic diameter and polydispersity index, determined by DLS, <sup>[c]</sup> Number-average diameter and associated dispersity, determined by TEM using equation (5), <sup>[e]</sup> Vinyl acetate molar fraction in the copolymer, determined by <sup>1</sup>H NMR using equation (14), <sup>[f]</sup> Melting temperature, determined by DSC, <sup>[g]</sup> Crystallization temperature, determined by DSC, <sup>[i]</sup> Crystallization rate, determined by DSC using equation (12), <sup>[h]</sup> Molar masses in number, in weight and dispersity, determined by HT-SEC, <sup>[i]</sup> Carbonyl index, determined by FTIR using equation (13).

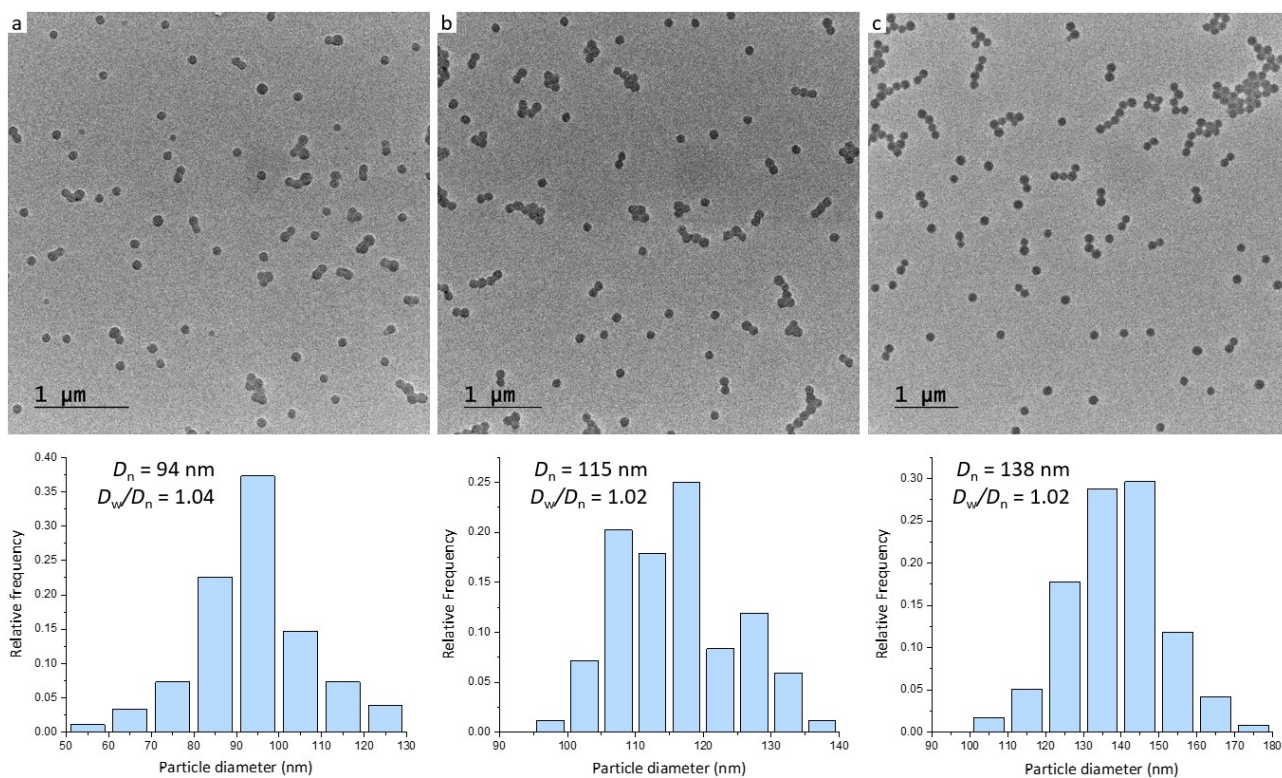

Figure S6: TEM images of EVA copolymer nanoparticles obtained by radical emulsion polymerization at different ethylene pressures. a)  $P_{\text{ethylene}} = 100$  bar, b)  $P_{\text{ethylene}} = 150$  bar, c)  $P_{\text{ethylene}} = 200$  bar. Synthesis conditions:  $[\text{APS}] = 1 \text{ g L}^{-1}$ ,  $[\text{NaHCO}_3] = 1 \text{ g L}^{-1}$ ,  $[\text{VAc}] = 0.12 \text{ mol L}^{-1}$ ,  $75^\circ\text{C}$ , 250 RPM, 4 h, pH = 7.8

### 3. Radical emulsion copolymerization of ethylene with carbon monoxide

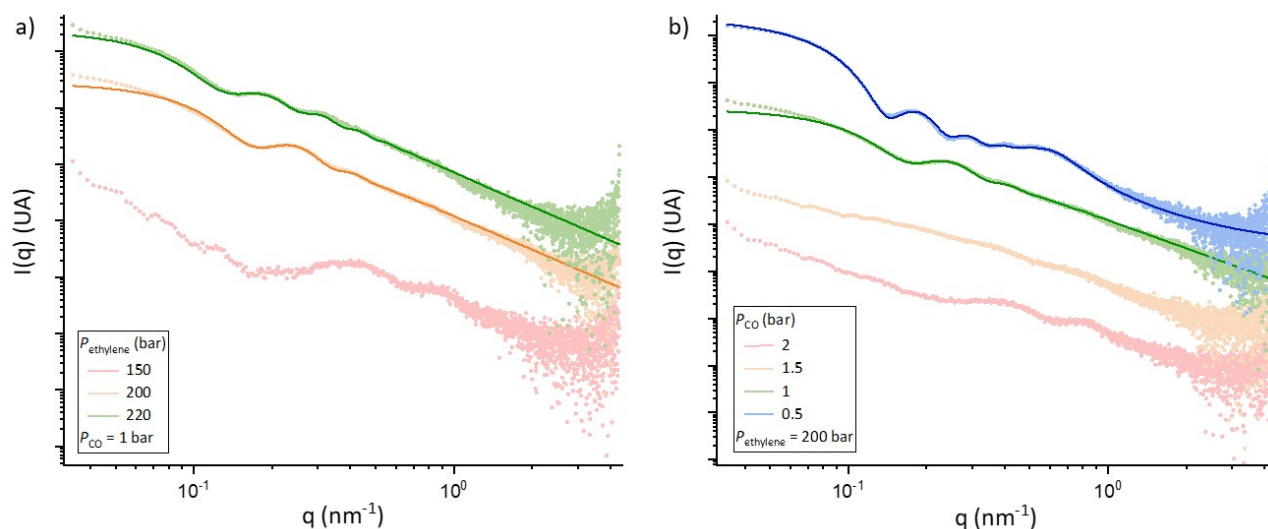

Figure S7 : SAXS curves of ECO copolymer nanoparticles obtained by radical emulsion polymerization with a) different ethylene pressures and b) different carbon monoxide pressures. Dashed lines represent raw datas, while full lines correspond to fitted curves (a multiplicative factor was applied to the intensity for clarity). Synthesis conditions:  $[\text{APS}] = 1 \text{ g L}^{-1}$ ,  $[\text{NaHCO}_3] = 1 \text{ g L}^{-1}$ ,  $75^\circ\text{C}$ , 250 RPM, 6 h,  $\text{pH} = 7.8$

Table S7 : SAXS goodness-of-fit parameters for ethylene-carbon monoxide copolymers

| $P_{\text{CO}}$<br>(bar) | $P_{\text{ETH}}$<br>(bar) | $R_f$   | $R_w$   |
|--------------------------|---------------------------|---------|---------|
| 0.5                      | 200                       | 0.03078 | 0.03336 |
| 1                        | 200                       | 0.03829 | 0.01953 |
| 1.5                      | 200                       | 0.09476 | 0.07046 |
| 2                        | 200                       | 0.14937 | 0.10036 |
| 1                        | 150                       | 0.03078 | 0.03336 |
| 1                        | 220                       | 0.09476 | 0.07065 |

Synthesis conditions:  $[\text{APS}] = 1 \text{ g L}^{-1}$ ,  $[\text{NaHCO}_3] = 1 \text{ g L}^{-1}$ ,  $75^\circ\text{C}$ , 250 RPM, 6 h,  $\text{pH} = 7.8$

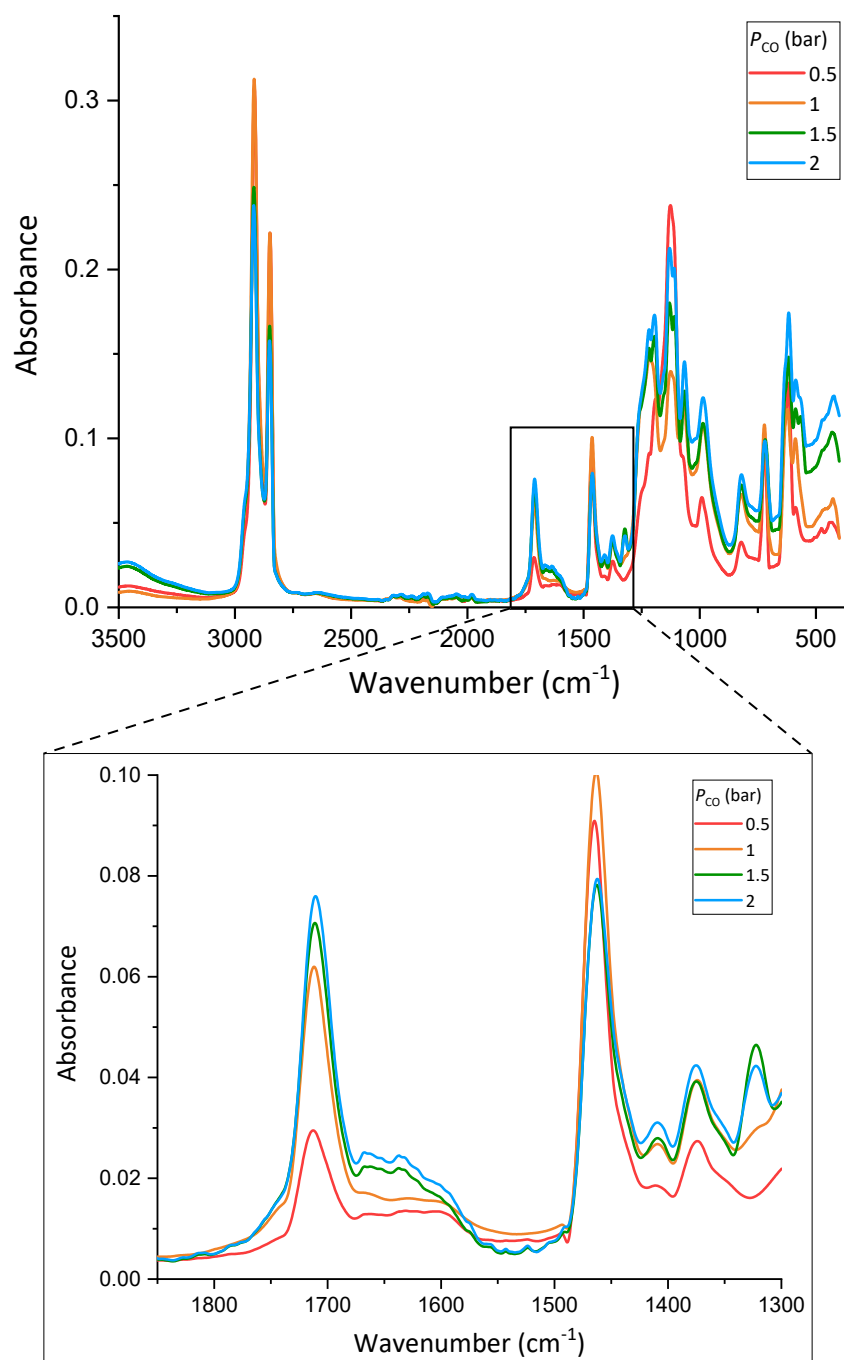

Figure S8: FTIR spectra of ECO copolymers obtained by surfactant-free radical emulsion copolymerization of ethylene and CO at different CO pressures. Synthesis conditions:  $[\text{APS}] = 1 \text{ g L}^{-1}$ ,  $[\text{NaHCO}_3] = 1 \text{ g L}^{-1}$ ,  $P_{\text{ethylene}} = 200 \text{ bar}$ ,  $75^\circ \text{C}$ , 250 RPM, 6 h,  $\text{pH} = 7.8$
